# Supplementary material
Source: PubMed Central journal article supplement (PMC463303)
Supplement: gb-2004-5-7-r46-s4.pdf [file gb-2004-5-7-r46-s4.pdf]

**Table 2. Homologous Myb protein hits from Swiss-Prot**

| <b>Motif</b> | <b>Protein ID</b>                                                                                                                                                                                                                                                                                                                                                                                                                                                                                                                                          |
|--------------|------------------------------------------------------------------------------------------------------------------------------------------------------------------------------------------------------------------------------------------------------------------------------------------------------------------------------------------------------------------------------------------------------------------------------------------------------------------------------------------------------------------------------------------------------------|
| E1           | Q38739, Q9ATD4, Q7XUV1, Q9XFM9, Q02992, Q9LXF1, Q9LSI7, Q84U53, O04110, Q9XHV0, Q8S2S2, AAQ62541, Q40173, Q8GUA1, Q84LP8, Q8H220, Q9LDR8, Q9LE63, Q8LBF0, Q8W4E0, O65409, Q9LDI5, Q8GRY3, O04141, Q9SEC4, BAC84030, Q7X6Q1, Q9LFE1, Q9SPG6, Q9S9Z2, Q7XQN2, Q9SPG7, Q9C7U7, Q9M0Y5, Q9FLR1, Q8GWP0, O49765, Q9SPG8, O23618, Q9SPG5, Q9SPG2, Q84NI9, Q8H0P2, Q8S415, Q8LPH6, O65249, O22685, Q9M0J5, Q9C695, Q84PP5, O49782, O42764, Q9SNW9, P20025, Q94GA6, Q9LHY6, P20026, Q9M118, Q9ZSI4, P20027, Q84TS3, Q8RUN0, Q8L438, Q9SM28, O49608, Q38850, Q9ATD1 |
| E2           | Q7XQN2, Q9XHV0                                                                                                                                                                                                                                                                                                                                                                                                                                                                                                                                             |
| E3           | O80883, Q8W1W5, Q9FR97, Q8W1W6, Q9LHS6, Q9FR42, Q9FR43, Q02994, Q9S773, Q96464, Q9ARM1, Q8SA38, P93417, Q9XEP0                                                                                                                                                                                                                                                                                                                                                                                                                                             |
| 1            | Q38739, Q9XFM9, Q02992, Q9ATD4, Q84U53, Q9LE63, Q8S2S2, Q9LXF1, Q7XUV1, Q8GUA1, Q9ZTF1, Q9M2D9, P80074, Q7XMK6, Q8S401, Q8S421                                                                                                                                                                                                                                                                                                                                                                                                                             |
| 2            | Q38739, Q9LE63, Q9XFM9, Q84U53                                                                                                                                                                                                                                                                                                                                                                                                                                                                                                                             |
| 3            | Q96276, P27900, Q9LF81, Q947R6, Q93VW0, Q93V34, Q93WP0, AAM14620, Q9SEI0, Q947R5                                                                                                                                                                                                                                                                                                                                                                                                                                                                           |
| 4            | Q42467, Q9CA52, Q8LBF8, Q9SCU7, Q9SBG3, Q9SN78, O04109, Q9ZTC1, Q9SPG0, P81392                                                                                                                                                                                                                                                                                                                                                                                                                                                                             |
| 5            | Q9LNC9, Q39153, Q9SJX8, Q9XIU5, Q9XIU9, Q9XIU8, Q7XBH4, O04140, Q9SLT2, Q02993, Q8L5N7, Q8L5N8                                                                                                                                                                                                                                                                                                                                                                                                                                                             |
| 6            | Q9LNC9, Q39153, Q9SJX8                                                                                                                                                                                                                                                                                                                                                                                                                                                                                                                                     |
| 7            | Q9SSA1, Q8L8W8, Q9SPG9, Q8LCG0, P93474, P81396, Q9LK95, O22684, P81391                                                                                                                                                                                                                                                                                                                                                                                                                                                                                     |
| 8            | Q9SMT1                                                                                                                                                                                                                                                                                                                                                                                                                                                                                                                                                     |
| 9, 10        | Q39154, Q8LBC5, Q941B3, Q9FDW1, Q8H0H0, Q9SN12, O49745, Q39155, O23160, Q9FZ15                                                                                                                                                                                                                                                                                                                                                                                                                                                                             |
| 11           | Q9ZTD7, Q9LMT5, Q8LCC8, Q9FX36, Q9ZTD9, Q9S7K6, Q9LLM9                                                                                                                                                                                                                                                                                                                                                                                                                                                                                                     |
| 12, 13       | Q9FUK9, Q9XH12, Q84NB7, O80931, O65366, Q9S7B2, Q94IB1, Q948M5                                                                                                                                                                                                                                                                                                                                                                                                                                                                                             |
| 14, 15       | O04498, P92948, Q8W149, Q7XVZ8, Q803E9, Q9W0R0, O08837, Q8K1J9, Q99974, Q96WP6, EAA33398, Q21119, P39964, Q03654                                                                                                                                                                                                                                                                                                                                                                                                                                           |
