# Supplementary material
Source: PubMed Central journal article supplement (PMC463303)

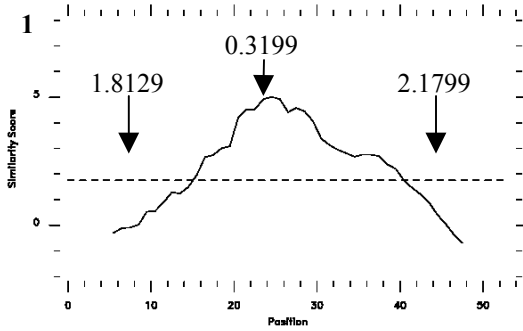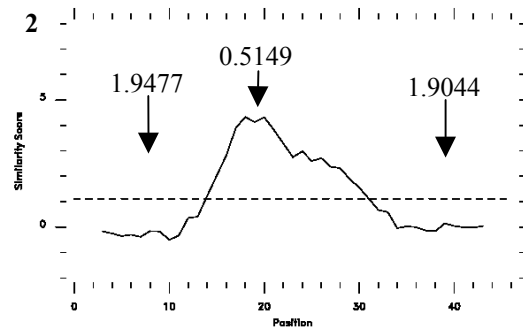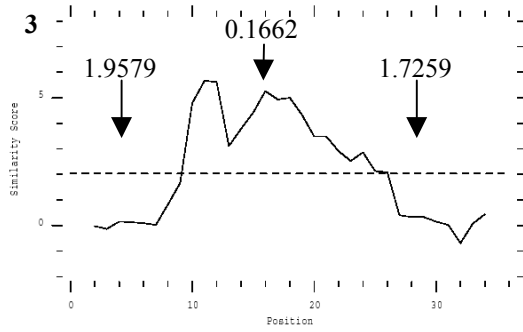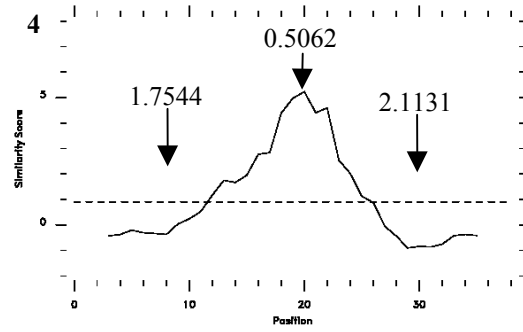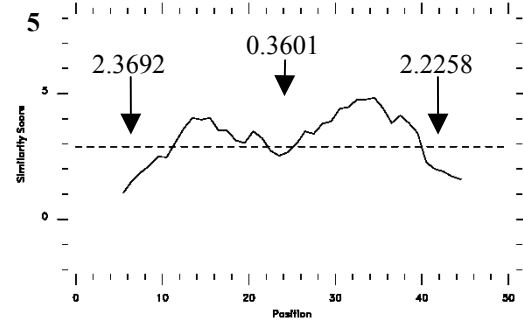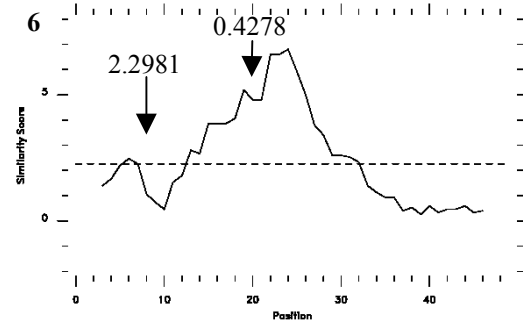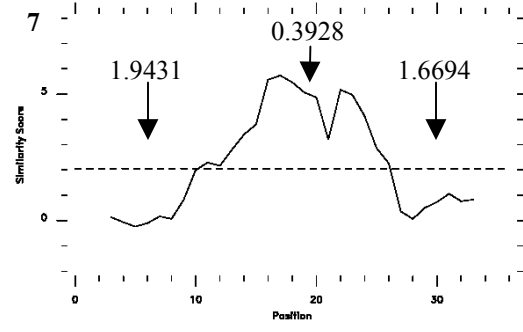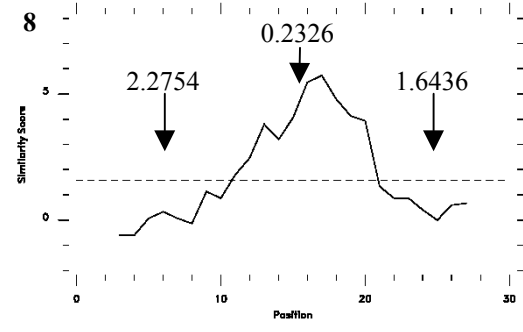

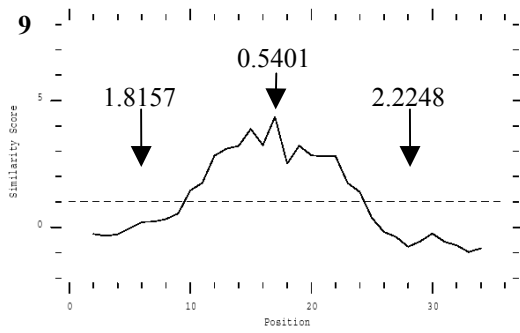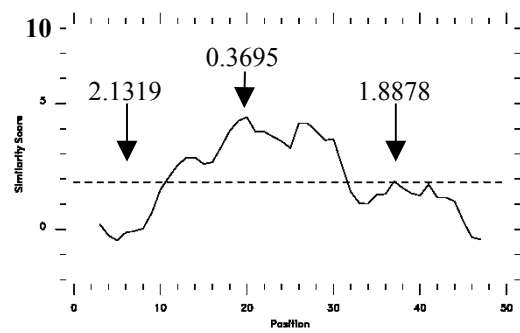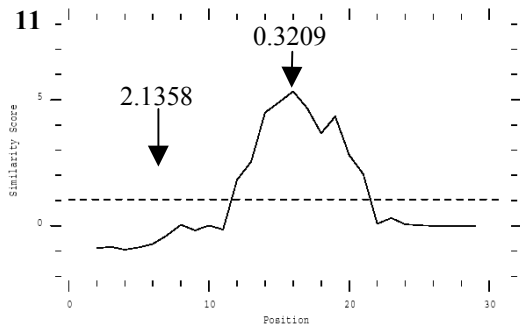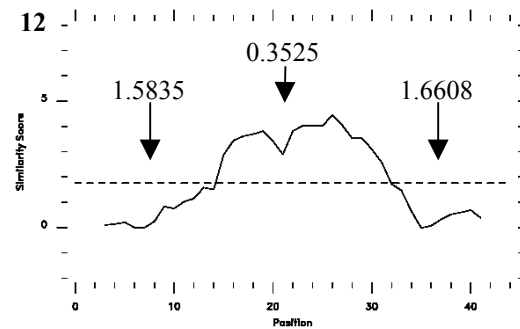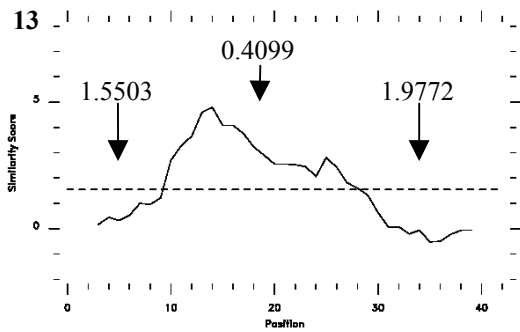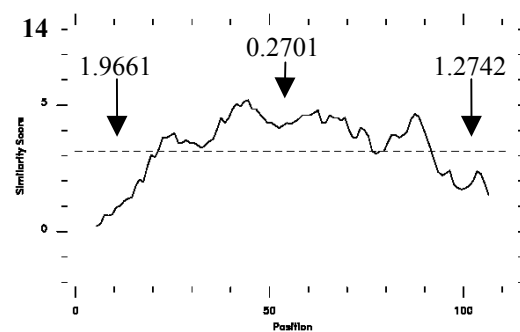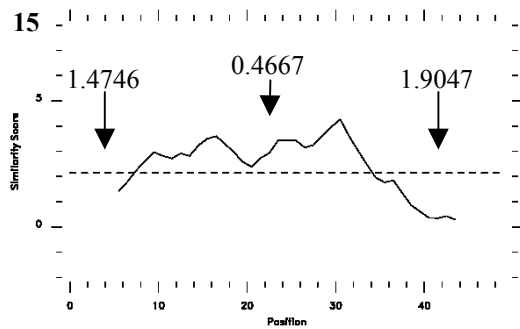

*Note:* Motifs 6 and 11 are too far in C-terminal region so that their dN values are not available.

Supplement: gb-2004-5-7-r46-s9.pdf [file gb-2004-5-7-r46-s9.pdf]
